# Supplementary material
Source: PubMed Central journal article supplement (PMC6738752)
Supplement: jin-0008-0579-s01.pdf [file jin-0008-0579-s01.pdf]

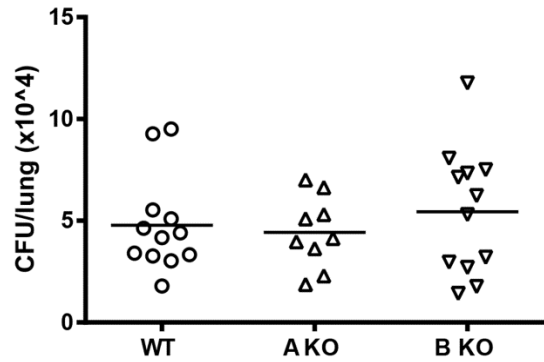

**Supplemental Figure 1. Comparable fungal loads in wildtype, ficolin-A knockout (KO), and ficolin-B KO mice following *A. fumigatus* infection.** Wildtype, ficolin-A KO and ficolin-B KO mice were intranasally inoculated with  $2 \times 10^7$  *A. fumigatus* conidia. Mice were sacrificed 24 hours post-infection for quantification of fungal load (CFU/lung) in whole lung homogenates. Results were obtained from two independent experiments (n=4-6/group in each experiment).
