# Supplementary material
Source: PubMed Central journal article supplement (PMC6738752)
Supplement: jin-0008-0579-s02.pdf [file jin-0008-0579-s02.pdf]

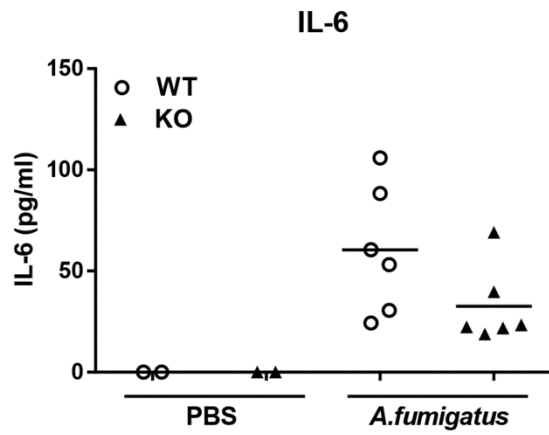

**Supplemental Figure 2. Serum IL-6 following *A. fumigatus* infection.** Wildtype or ficolin KO mice were intranasally inoculated with  $2 \times 10^7$  *A. fumigatus* conidia and control mice received PBS. Serum samples were obtained 24 hours post-infection and concentration of IL-6 in serum was determined by ELISA. Results are obtained from one experiment
