# Supplementary material
Source: PubMed Central journal article supplement (PMC6738752)
Supplement: jin-0008-0579-s03.pdf [file jin-0008-0579-s03.pdf]

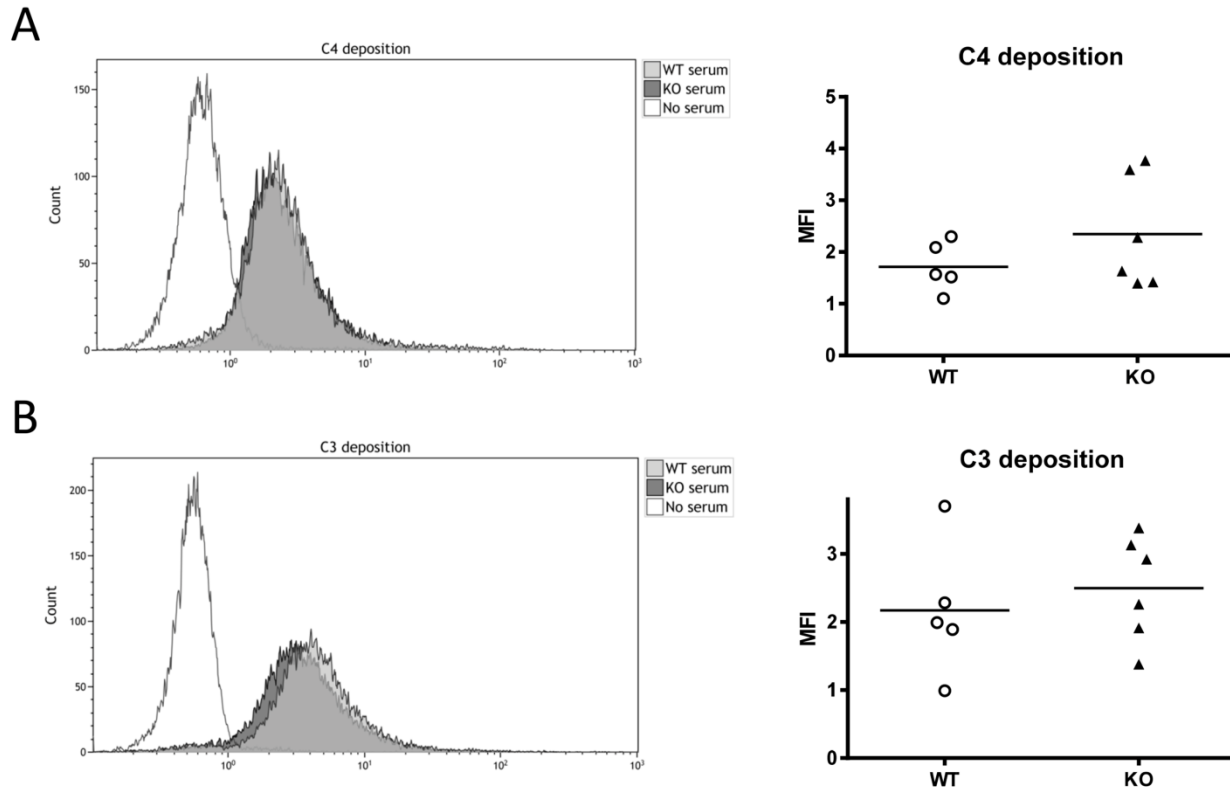

**Supplemental Figure 3. Complement deposition on *A. fumigatus in vitro*.** Heat-inactivated *A. fumigatus* conidia was incubated with 20% serum from WT or ficolin KO mice for 45 minutes at 37°C. Complement deposition on *A. fumigatus* was detected by flow cytometry using antibodies against C4 (A) or C3 (B). The representative histograms (left) show the level of complement deposition from WT serum, KO serum or no serum on *A. fumigatus* and the graphs (right) show results obtained using serum from individual mice (N=5-6).
